# Supplementary material
Source: ML conference proceedings conference paper supplement (https://proceedings.mlr.press/v80/chen18c.html)
Supplement: Supplementary file [file chen18c-supp.pdf]

## A. Variance Reduction Theorem

Each of our results relies on a recent variance reduction technique, proposed by (Mokhtari et al., 2018a;b). We now present Theorem 3, which appears as Lemma 2 in (Mokhtari et al., 2018a). Although the proof is essentially the same, we present it here so that it is self-contained. When we apply Theorem 3 in the analysis of our algorithms, we will have that  $\{\mathbf{a}_t\}$  are a sequence of gradients,  $\{\tilde{\mathbf{a}}_t\}$  are stochastic gradient estimates, and  $\{\mathbf{d}_t\}$  are the sequence of averaged gradient estimates. Moreover, the upper bound on the norm of the difference of gradients  $\|\mathbf{a}_t - \mathbf{a}_{t-1}\|$  comes from the iterate update procedure and smoothness of the objective function.

**Theorem 3.** *Let  $\{\mathbf{a}_t\}_{t=0}^T$  be a sequence of points in  $\mathbb{R}^n$  such that  $\|\mathbf{a}_t - \mathbf{a}_{t-1}\| \leq G/(t+s)$  for all  $1 \leq t \leq T$  with fixed constants  $G \geq 0$  and  $s \geq 3$ . Let  $\{\tilde{\mathbf{a}}_t\}_{t=1}^T$  be a sequence of random variables such that  $\mathbb{E}[\tilde{\mathbf{a}}_t | \mathcal{F}_{t-1}] = \mathbf{a}_t$  and  $\mathbb{E}[\|\tilde{\mathbf{a}}_t - \mathbf{a}_t\|^2 | \mathcal{F}_{t-1}] \leq \sigma^2$  for every  $t \geq 0$ , where  $\mathcal{F}_{t-1}$  is the  $\sigma$ -field generated by  $\{\tilde{\mathbf{a}}_i\}_{i=1}^t$  and  $\mathcal{F}_0 = \emptyset$ . Let  $\{\mathbf{d}_t\}_{t=0}^T$  be a sequence of random variables where  $\mathbf{d}_0$  is fixed and subsequent  $\mathbf{d}_t$  are obtained by the recurrence*

$$\mathbf{d}_t = (1 - \rho_t)\mathbf{d}_{t-1} + \rho_t\tilde{\mathbf{a}}_t$$

with  $\rho_t = \frac{2}{(t+s)^{2/3}}$ . Then, we have

$$\mathbb{E}[\|\mathbf{a}_t - \mathbf{d}_t\|^2] \leq \frac{Q}{(t+s+1)^{2/3}},$$

where  $Q \triangleq \max\{\|\mathbf{a}_0 - \mathbf{d}_0\|^2(s+1)^{2/3}, 4\sigma^2 + 3G^2/2\}$ .

We remark that we only need  $s \geq 2^{3/2} \approx 2.83$  in the statement of Theorem 3.

*Proof.* Let  $\Delta_t = \|\mathbf{a}_t - \mathbf{d}_t\|^2$ . We have the following identity

$$\Delta_t = \|\rho_t(\mathbf{a}_t - \tilde{\mathbf{a}}_t) + (1 - \rho_t)(\mathbf{a}_t - \mathbf{a}_{t-1}) + (1 - \rho_t)(\mathbf{a}_{t-1} - \mathbf{d}_{t-1})\|^2.$$

Expanding the square and taking the expectation with respect to  $\mathcal{F}_{t-1}$  gives

$$\mathbb{E}[\Delta_t | \mathcal{F}_{t-1}] \leq \rho_t^2 \sigma^2 + (1 - \rho_t)^2 \frac{G^2}{(t+s)^2} + (1 - \rho_t)^2 \Delta_{t-1} + 2(1 - \rho_t)^2 \mathbb{E}[\langle \mathbf{a}_t - \mathbf{a}_{t-1}, \mathbf{a}_{t-1} - \mathbf{d}_{t-1} \rangle | \mathcal{F}_{t-1}].$$

Taking the expectation again gives

$$\mathbb{E}[\Delta_t] \leq \rho_t^2 \sigma^2 + (1 - \rho_t)^2 \frac{G^2}{(t+s)^2} + (1 - \rho_t)^2 \mathbb{E}[\Delta_{t-1}] + 2(1 - \rho_t)^2 \mathbb{E}[\langle \mathbf{a}_t - \mathbf{a}_{t-1}, \mathbf{a}_{t-1} - \mathbf{d}_{t-1} \rangle].$$

By Young's inequality, we have

$$2\langle \mathbf{a}_t - \mathbf{a}_{t-1}, \mathbf{a}_{t-1} - \mathbf{d}_{t-1} \rangle \leq \beta_t \|\mathbf{a}_{t-1} - \mathbf{d}_{t-1}\|^2 + (1/\beta_t) \frac{G^2}{(t+s)^2}.$$

Therefore we deduce

$$\begin{aligned} \mathbb{E}[\Delta_t] &\leq \rho_t^2 \sigma^2 + (1 - \rho_t)^2 \frac{G^2}{(t+s)^2} + (1 - \rho_t)^2 \mathbb{E}[\Delta_{t-1}] + (1 - \rho_t)^2 \left( \beta_t \mathbb{E}[\Delta_{t-1}] + (1/\beta_t) \frac{G^2}{(t+s)^2} \right) \\ &\leq \rho_t^2 \sigma^2 + \frac{G^2}{(t+s)^2} (1 - \rho_t)^2 \left( 1 + \frac{1}{\beta_t} \right) + \mathbb{E}[\Delta_{t-1}] (1 - \rho_t)^2 (1 + \beta_t). \end{aligned}$$

We write  $z_t$  for  $\mathbb{E}[\Delta_t]$ . Notice that  $(1 - \rho_t)(1 + \rho_t/2) \leq 1$  as long as  $\rho_t \geq 0$ . If we assume  $\rho_t \in [0, 1]$ , setting  $\beta_t = \rho_t/2$  yields

$$\begin{aligned} z_t &\leq \rho_t^2 \sigma^2 + \frac{G^2}{(t+s)^2} (1 - \rho_t)^2 \left( 1 + \frac{2}{\rho_t} \right) + z_{t-1} (1 - \rho_t)^2 \left( 1 + \frac{\rho_t}{2} \right) \\ &\leq \rho_t^2 \sigma^2 + \frac{G^2}{(t+s)^2} \left( 1 + \frac{2}{\rho_t} \right) + z_{t-1} (1 - \rho_t). \end{aligned}$$

We set  $\rho_t = \frac{2}{(t+s)^{2/3}}$ , where  $s^{2/3} \geq 2$ . Since  $(t+s)^2 = (t+s)^{4/3}(t+s)^{2/3} \geq 2(t+s)^{4/3}$ , we have

$$\begin{aligned} z_t &\leq \left(1 - \frac{2}{(t+s)^{2/3}}\right)z_{t-1} + \frac{4\sigma^2}{(t+s)^{4/3}} + \frac{G^2}{(t+s)^2} + \frac{G^2}{(t+s)^{4/3}} \\ &\leq \left(1 - \frac{2}{(t+s)^{2/3}}\right)z_{t-1} + \frac{4\sigma^2}{(t+s)^{4/3}} + \frac{3G^2}{2(t+s)^{4/3}} \\ &\leq \left(1 - \frac{2}{(t+s)^{2/3}}\right)z_{t-1} + \frac{4\sigma^2 + 3G^2/2}{(t+s)^{4/3}} \\ &\leq \left(1 - \frac{2}{(t+s)^{2/3}}\right)z_{t-1} + \frac{Q}{(t+s)^{4/3}}. \end{aligned}$$

We claim  $z_t \leq \frac{Q}{(t+s+1)^{2/3}}$  for  $\forall 0 \leq t \leq T$  and show this by induction. It holds for  $t = 0$  due to the definition of  $Q$ . Now we assume that it is true for  $t = k - 1$ . We have

$$\begin{aligned} z_k &\leq \left(1 - \frac{2}{(k+s)^{2/3}}\right)z_{k-1} + \frac{Q}{(k+s)^{4/3}} \\ &\leq \left(1 - \frac{2}{(k+s)^{2/3}}\right)\frac{Q}{(k+s)^{2/3}} + \frac{Q}{(k+s)^{4/3}} \\ &= Q\frac{(k+s)^{2/3} - 1}{(k+s)^{4/3}}. \end{aligned}$$

In order to show that  $z_k \leq \frac{Q}{(k+s+1)^{2/3}}$ , it suffices to show that

$$((k+s)^{2/3} - 1)(k+s+1)^{2/3} \leq (k+s)^{4/3}.$$

The above inequality holds since  $(k+s+1)^{2/3} \leq (k+s)^{2/3} + 1$ .  $\square$

## B. Proof of Theorem 1: Convex Case

We begin by examining the sequence of iterates  $\mathbf{x}_t^{(1)}, \mathbf{x}_t^{(2)}, \dots, \mathbf{x}_t^{(K+1)}$  produced in Algorithm 1 for a fixed  $t$ . By definition of the update and because  $f_t$  is  $L$ -smooth, we have

$$\begin{aligned} f_t(\mathbf{x}_t^{(k+1)}) - f_t(\mathbf{x}^*) &= f_t(\mathbf{x}_t^{(k)} + \eta_k(\mathbf{v}_t^{(k)} - \mathbf{x}_t^{(k)})) - f_t(\mathbf{x}^*) \\ &\leq f_t(\mathbf{x}_t^{(k)}) - f_t(\mathbf{x}^*) + \eta_k \langle \nabla f_t(\mathbf{x}_t^{(k)}), \mathbf{v}_t^{(k)} - \mathbf{x}_t^{(k)} \rangle + \eta_k^2 \frac{L}{2} \|\mathbf{v}_t^{(k)} - \mathbf{x}_t^{(k)}\|^2 \\ &\leq f_t(\mathbf{x}_t^{(k)}) - f_t(\mathbf{x}^*) + \eta_k \langle \nabla f_t(\mathbf{x}_t^{(k)}), \mathbf{v}_t^{(k)} - \mathbf{x}_t^{(k)} \rangle + \eta_k^2 \frac{LD^2}{2}. \end{aligned}$$

Now, observe that the dual pairing may be decomposed as

$$\langle \nabla f_t(\mathbf{x}_t^{(k)}), \mathbf{v}_t^{(k)} - \mathbf{x}_t^{(k)} \rangle = \langle \nabla f_t(\mathbf{x}_t^{(k)}) - \mathbf{d}_t^{(k)}, \mathbf{v}_t^{(k)} - \mathbf{x}^* \rangle + \langle \nabla f_t(\mathbf{x}_t^{(k)}), \mathbf{x}^* - \mathbf{x}_t^{(k)} \rangle + \langle \mathbf{d}_t^{(k)}, \mathbf{v}_t^{(k)} - \mathbf{x}^* \rangle.$$

We can bound the first term using Young's Inequality to get

$$\begin{aligned} \langle \nabla f_t(\mathbf{x}_t^{(k)}) - \mathbf{d}_t^{(k)}, \mathbf{v}_t^{(k)} - \mathbf{x}^* \rangle &\leq \frac{1}{2\beta_k} \|\nabla f_t(\mathbf{x}_t^{(k)}) - \mathbf{d}_t^{(k)}\|^2 + 2\beta_k \|\mathbf{v}_t^{(k)} - \mathbf{x}^*\|^2 \\ &\leq \frac{1}{2\beta_k} \|\nabla f_t(\mathbf{x}_t^{(k)}) - \mathbf{d}_t^{(k)}\|^2 + 2\beta_k D^2 \end{aligned}$$

for any  $\beta_k > 0$ , which will be chosen later in the proof. We may also bound the second term in the decomposition of the dual pairing using convexity of  $f_t$ , i.e.  $\langle \nabla f_t(\mathbf{x}_t^{(k)}), \mathbf{x}^* - \mathbf{x}_t^{(k)} \rangle \leq f_t(\mathbf{x}^*) - f_t(\mathbf{x}_t^{(k)})$ . Using these upper bounds, we get that

$$\langle \nabla f_t(\mathbf{x}_t^{(k)}), \mathbf{v}_t^{(k)} - \mathbf{x}_t^{(k)} \rangle \leq \frac{1}{2\beta_k} \|f_t(\mathbf{x}_t^{(k)}) - \mathbf{d}_t^{(k)}\|^2 + 2\beta_k D^2 + f_t(\mathbf{x}^*) - f_t(\mathbf{x}_t^{(k)}) + \langle \mathbf{d}_t^{(k)}, \mathbf{v}_t^{(k)} - \mathbf{x}^* \rangle.$$

Using this upper bound on the dual pairing in the first inequality, we get that

$$f_t(\mathbf{x}_t^{(k+1)}) - f_t(\mathbf{x}^*) \leq (1 - \eta_k)(f_t(\mathbf{x}_t^{(k)}) - f_t(\mathbf{x}^*)) + \eta_k \left[ \frac{1}{2\beta_k} \|f_t(\mathbf{x}_t^{(k)}) - \mathbf{d}_t^{(k)}\|^2 + 2\beta_k D^2 + \langle \mathbf{d}_t^{(k)}, \mathbf{v}_t^{(k)} - \mathbf{x}^* \rangle + \eta_k \frac{LD^2}{2} \right].$$

Now we will apply the variance reduction technique. Note that

$$\|\nabla f_t(\mathbf{x}_t^{(k+1)}) - \nabla f_t(\mathbf{x}_t^{(k)})\| \leq L \|\mathbf{x}_t^{(k+1)} - \mathbf{x}_t^{(k)}\| \leq L\eta_k \|\mathbf{x}_t^{(k)} - \mathbf{v}_t^{(k)}\| \leq \frac{LD}{k+3}$$

Where we have used that  $f_t$  is  $L$ -smooth, the convex update, and that the step size is  $\eta_k = \frac{1}{k+3}$ . Now, using Theorem 3 with  $G = LD$  and  $s = 3$ , we have that

$$\mathbb{E}[\|f_t(\mathbf{x}_t^{(k)}) - \mathbf{d}_t^{(k)}\|^2] \leq \frac{Q_t}{(k+4)^{2/3}} \leq \frac{Q}{(k+4)^{2/3}}.$$

Where  $Q_t \triangleq \max\{\|\nabla f_t(\mathbf{x}_1)\|^2 4^{2/3}, 4\sigma^2 + 3(LD)^2/2\}$  and  $Q \triangleq \max\{4^{2/3} \max_{1 \leq t \leq T} \|\nabla f_t(\mathbf{x}_1)\|^2, 4\sigma^2 + 3(LD)^2/2\}$ . Thus, taking expectation of both sides of the optimality gap and setting  $\beta_k = \frac{Q^{1/2}}{2D(k+4)^{1/3}}$  yields

$$\mathbb{E}[f_t(\mathbf{x}_t^{(k+1)})] - f_t(\mathbf{x}^*) \leq (1 - \eta_k)(\mathbb{E}[f_t(\mathbf{x}_t^{(k)})] - f_t(\mathbf{x}^*)) + \eta_k \left[ \frac{2Q^{1/2}D}{(k+4)^{1/3}} + \langle \mathbf{d}_t^{(k)}, \mathbf{v}_t^{(k)} - \mathbf{x}^* \rangle + \eta_k \frac{LD^2}{2} \right].$$

Now we have obtained an upper bound on the expected optimality gap  $\mathbb{E}[f_t(\mathbf{x}_t^{(k+1)})] - f_t(\mathbf{x}^*)$  in terms of the expected optimality gap  $\mathbb{E}[f_t(\mathbf{x}_t^{(k)})] - f_t(\mathbf{x}^*)$  in the previous iteration. By induction on  $k$ , we get that the final iterate in the sequence,  $\mathbf{x}_t \triangleq \mathbf{x}_t^{(K+1)}$ , satisfies the following expected optimality gap

$$\mathbb{E}[f_t(\mathbf{x}_t)] - f_t(\mathbf{x}^*) \leq \prod_{k=1}^K (1 - \eta_k) [f_t(\mathbf{x}_1) - f_t(\mathbf{x}^*)] + \sum_{k=1}^K \eta_k \prod_{j=k+1}^K (1 - \eta_j) \left[ \frac{2Q^{1/2}D}{(k+4)^{1/3}} + \langle \mathbf{d}_t^{(k)}, \mathbf{v}_t^{(k)} - \mathbf{x}^* \rangle + \eta_k \frac{LD^2}{2} \right] \quad (2)$$

Recall that the Frank Wolfe step sizes are  $\eta_k = \frac{1}{k+3}$ . We may obtain upper bounds on product of the form  $\prod_{k=r}^K (1 - \eta_k)$  by

$$\prod_{k=r}^K (1 - \eta_k) = \prod_{k=r}^K \left(1 - \frac{1}{k+3}\right) \leq \exp\left(-\sum_{k=r}^K \frac{1}{k+3}\right) \leq \exp\left(-\int_{x=r}^{K+1} \frac{1}{x+3} dx\right) = \frac{r+3}{K+4} \leq \frac{r+3}{K}$$

Substituting step sizes  $\eta_k = \frac{1}{k+3}$  into Eq (2) and using this upper bound yields

$$\mathbb{E}[f_t(\mathbf{x}_t)] - f_t(\mathbf{x}^*) \leq \frac{4}{K} [f_t(\mathbf{x}_1) - f_t(\mathbf{x}^*)] + \sum_{k=1}^K \left(\frac{1}{k+3} \cdot \frac{k+4}{K}\right) \left[ \frac{2Q^{1/2}D}{(k+4)^{1/3}} + \langle \mathbf{d}_t^{(k)}, \mathbf{v}_t^{(k)} - \mathbf{x}^* \rangle + \frac{LD^2}{2(k+3)} \right] \quad (3)$$

Which may be further simplified by using  $\left(\frac{1}{k+3} \cdot \frac{k+4}{K}\right) \leq \frac{4}{3K}$  to obtain

$$\mathbb{E}[f_t(\mathbf{x}_t)] - f_t(\mathbf{x}^*) \leq \frac{4}{K} [f_t(\mathbf{x}_1) - f_t(\mathbf{x}^*)] + \frac{4}{3K} \sum_{k=1}^K \left[ \frac{2Q^{1/2}D}{(k+3)^{1/3}} + \langle \mathbf{d}_t^{(k)}, \mathbf{v}_t^{(k)} - \mathbf{x}^* \rangle + \frac{LD^2}{2(k+3)} \right],$$

As before, we can obtain the following upper bounds using integral methods:

$$\sum_{k=1}^K \frac{1}{k+3} \leq \log\left(\frac{K+3}{3}\right) \leq \log(K+1) \quad \text{and} \quad \sum_{k=1}^K \frac{1}{(k+3)^{1/3}} \leq \frac{3}{2} \left( (K+3)^{2/3} - 3^{2/3} \right) \leq \frac{3}{2} K^{2/3}$$

Substituting these bounds into Eq (3) yields

$$\mathbb{E}[f_t(\mathbf{x}_t)] - f_t(\mathbf{x}^*) \leq \frac{4}{K} [f_t(\mathbf{x}_1) - f_t(\mathbf{x}^*)] + \frac{4Q^{1/2}D}{K^{1/3}} + \frac{4LD^2 \log(K+1)}{3K} + \frac{4}{3K} \sum_{k=1}^K \langle \mathbf{d}_t^{(k)}, \mathbf{v}_t^{(k)} - \mathbf{x}^* \rangle.$$

Now, we can begin to bound regret by summing over all  $t = 1 \dots T$  to obtain

$$\begin{aligned} \sum_{t=1}^T \mathbb{E}[f_t(\mathbf{x}_t)] - \sum_{t=1}^T f_t(\mathbf{x}^*) &\leq \frac{4}{K} \sum_{t=1}^T [f_t(\mathbf{x}_1) - f_t(\mathbf{x}^*)] + \frac{4TQ^{1/2}D}{K^{1/3}} \\ &\quad + \frac{4TLD^2 \log(K+1)}{3K} + \frac{4}{3K} \sum_{t=1}^T \sum_{k=1}^K \langle \mathbf{d}_t^{(k)}, \mathbf{v}_t^{(k)} - \mathbf{x}^* \rangle \end{aligned}$$

Recall that for a fixed  $k$ , the sequence  $\{\mathbf{v}_t^{(k)}\}_{t=1}^T$  is produced by a online linear minimization oracle with regret  $\mathcal{R}_T^\mathcal{E}$  so that

$$\sum_{t=1}^T \langle \mathbf{d}_t^{(k)}, \mathbf{v}_t^{(k)} - \mathbf{x}^* \rangle \leq \sum_{t=1}^T \langle \mathbf{d}_t^{(k)}, \mathbf{v}_t^{(k)} \rangle - \min_{\mathbf{x} \in \mathcal{K}} \sum_{t=1}^T \langle \mathbf{d}_t^{(k)}, \mathbf{x} \rangle \leq \mathcal{R}_T^\mathcal{E}.$$

Substituting this into the upper bound and using  $M = \max_{1 \leq t \leq T} [f_t(\mathbf{x}_1) - f_t(\mathbf{x}^*)]$  yields

$$\sum_{t=1}^T \mathbb{E}[f_t(\mathbf{x}_t)] - \sum_{t=1}^T f_t(\mathbf{x}^*) \leq \frac{4TDQ^{1/2}}{K^{1/3}} + \frac{4T}{K} \left( M + \frac{LD^2}{3} \log(K+1) \right) + \frac{4}{3} \mathcal{R}_T^\mathcal{E}$$

Now, setting  $K = T^{3/2}$  and using a linear oracle with  $\mathcal{R}_T^\mathcal{E} = O(\sqrt{T})$  yields

$$\begin{aligned} \sum_{t=1}^T \mathbb{E}[f_t(\mathbf{x}_t)] - \sum_{t=1}^T f_t(\mathbf{x}^*) &\leq 4\sqrt{T}DQ^{1/2} + \frac{4}{\sqrt{T}} \left( M + \frac{LD^2}{3} (\log T^{3/2} + 1) \right) + \frac{4}{3} \mathcal{R}_T^\mathcal{E} \\ &= O(\sqrt{T}). \end{aligned}$$

### C. Proof of Theorem 1: DR-Submodular Case

Using the smoothness of  $f_t$  and recalling  $\mathbf{x}_t^{(k+1)} - \mathbf{x}_t^{(k)} = \frac{1}{K} \mathbf{v}_t^{(k)}$ , we have

$$\begin{aligned} f_t(\mathbf{x}_t^{(k+1)}) &\geq f_t(\mathbf{x}_t^{(k)}) + \langle \nabla f_t(\mathbf{x}_t^{(k)}), \mathbf{x}_t^{(k+1)} - \mathbf{x}_t^{(k)} \rangle - \frac{L}{2} \|\mathbf{x}_t^{(k+1)} - \mathbf{x}_t^{(k)}\|^2 \\ &= f_t(\mathbf{x}_t^{(k)}) + \langle \frac{1}{K} \nabla f_t(\mathbf{x}_t^{(k)}), \mathbf{v}_t^{(k)} \rangle - \frac{L}{2K^2} \|\mathbf{v}_t^{(k)}\|^2 \\ &\geq f_t(\mathbf{x}_t^{(k)}) + \frac{1}{K} \langle \nabla f_t(\mathbf{x}_t^{(k)}), \mathbf{v}_t^{(k)} \rangle - \frac{LD^2}{2K^2}. \end{aligned} \tag{4}$$

We can re-write the term  $\langle \nabla f_t(\mathbf{x}_t^{(k)}), \mathbf{v}_t^{(k)} \rangle$  as

$$\begin{aligned} \langle \nabla f_t(\mathbf{x}_t^{(k)}), \mathbf{v}_t^{(k)} \rangle &= \langle \nabla f_t(\mathbf{x}_t^{(k)}) - \mathbf{d}_t^{(k)}, \mathbf{v}_t^{(k)} \rangle + \langle \mathbf{d}_t^{(k)}, \mathbf{v}_t^{(k)} \rangle \\ &= \langle \nabla f_t(\mathbf{x}_t^{(k)}) - \mathbf{d}_t^{(k)}, \mathbf{v}_t^{(k)} \rangle + \langle \mathbf{d}_t^{(k)}, \mathbf{x}^* \rangle + \langle \mathbf{d}_t^{(k)}, \mathbf{v}_t^{(k)} - \mathbf{x}^* \rangle \\ &= \langle \nabla f_t(\mathbf{x}_t^{(k)}) - \mathbf{d}_t^{(k)}, \mathbf{v}_t^{(k)} - \mathbf{x}^* \rangle + \langle \nabla f_t(\mathbf{x}_t^{(k)}), \mathbf{x}^* \rangle + \langle \mathbf{d}_t^{(k)}, \mathbf{v}_t^{(k)} - \mathbf{x}^* \rangle. \end{aligned} \tag{5}$$

We claim  $\langle \nabla f_t(\mathbf{x}_t^{(k)}), \mathbf{x}^* \rangle \geq f_t(\mathbf{x}^*) - f_t(\mathbf{x}_t^{(k)})$ . Indeed, using monotonicity of  $f_t$  and concavity along non-negative directions, we have

$$\begin{aligned} f_t(\mathbf{x}^*) - f_t(\mathbf{x}_t^{(k)}) &\leq f_t(\mathbf{x}^* \vee \mathbf{x}_t^{(k)}) - f_t(\mathbf{x}_t^{(k)}) \\ &\leq \langle \nabla f_t(\mathbf{x}_t^{(k)}), \mathbf{x}^* \vee \mathbf{x}_t^{(k)} - \mathbf{x}_t^{(k)} \rangle \\ &= \langle \nabla f_t(\mathbf{x}_t^{(k)}), (\mathbf{x}^* - \mathbf{x}_t^{(k)}) \vee 0 \rangle \\ &\leq \langle \nabla f_t(\mathbf{x}_t^{(k)}), \mathbf{x}^* \rangle. \end{aligned} \quad (6)$$

Plugging Eq. (6) into Eq. (5), we obtain

$$\langle \nabla f_t(\mathbf{x}_t^{(k)}), \mathbf{v}_t^{(k)} \rangle \geq \langle \nabla f_t(\mathbf{x}_t^{(k)}) - \mathbf{d}_t^{(k)}, \mathbf{v}_t^{(k)} - \mathbf{x}^* \rangle + \langle \mathbf{d}_t^{(k)}, \mathbf{v}_t^{(k)} - \mathbf{x}^* \rangle + (f_t(\mathbf{x}^*) - f_t(\mathbf{x}_t^{(k)})). \quad (7)$$

Using Young's inequality, we can show that

$$\begin{aligned} \langle \nabla f_t(\mathbf{x}_t^{(k)}) - \mathbf{d}_t^{(k)}, \mathbf{v}_t^{(k)} - \mathbf{x}^* \rangle &\geq -\frac{1}{2\beta^{(k)}} \|\nabla f_t(\mathbf{x}_t^{(k)}) - \mathbf{d}_t^{(k)}\|^2 - \frac{\beta^{(k)}}{2} \|\mathbf{v}_t^{(k)} - \mathbf{x}^*\|^2 \\ &\geq -\frac{1}{2\beta^{(k)}} \|\nabla f_t(\mathbf{x}_t^{(k)}) - \mathbf{d}_t^{(k)}\|^2 - \beta^{(k)} D^2/2 \end{aligned} \quad (8)$$

Then we plug Eqs. (7) and (8) into Eq. (4), we deduce

$$f_t(\mathbf{x}_t^{(k+1)}) \geq f_t(\mathbf{x}_t^{(k)}) + \frac{1}{K} \left[ -\frac{1}{2\beta^{(k)}} \|\nabla f_t(\mathbf{x}_t^{(k)}) - \mathbf{d}_t^{(k)}\|^2 - \beta^{(k)} D^2/2 + \langle \mathbf{d}_t^{(k)}, \mathbf{v}_t^{(k)} - \mathbf{x}^* \rangle + (f_t(\mathbf{x}^*) - f_t(\mathbf{x}_t^{(k)})) \right] - \frac{LD^2}{2K^2}.$$

Equivalently, we have

$$\begin{aligned} f_t(\mathbf{x}^*) - f_t(\mathbf{x}_t^{(k+1)}) &\leq (1 - 1/K)[f_t(\mathbf{x}^*) - f_t(\mathbf{x}_t^{(k)})] \\ &\quad - \frac{1}{K} \left[ -\frac{1}{2\beta^{(k)}} \|\nabla f_t(\mathbf{x}_t^{(k)}) - \mathbf{d}_t^{(k)}\|^2 - \beta^{(k)} D^2/2 + \langle \mathbf{d}_t^{(k)}, \mathbf{v}_t^{(k)} - \mathbf{x}^* \rangle \right] + \frac{LD^2}{2K^2}. \end{aligned} \quad (9)$$

Applying Eq. (9) recursively for  $1 \leq k \leq K$  immediately yields

$$\begin{aligned} f_t(\mathbf{x}^*) - f_t(\mathbf{x}_t^{(k+1)}) &\leq (1 - 1/K)^K [f_t(\mathbf{x}^*) - f_t(\mathbf{x}_t^{(1)})] \\ &\quad + \frac{1}{K} \sum_{k=1}^K \left[ \frac{1}{2\beta^{(k)}} \|\nabla f_t(\mathbf{x}_t^{(k)}) - \mathbf{d}_t^{(k)}\|^2 + \beta^{(k)} D^2/2 + \langle \mathbf{d}_t^{(k)}, \mathbf{x}^* - \mathbf{v}_t^{(k)} \rangle \right] + \frac{LD^2}{2K}. \end{aligned}$$

Recall that the point played in round  $t$  is  $\mathbf{x}_t \triangleq \mathbf{x}_t^{(K+1)}$ , the first iterate in the sequence is  $\mathbf{x}_t^{(1)} = 0$ , and that  $(1 - 1/K)^K \leq 1/e$  for all  $K \geq 1$  so that

$$f_t(\mathbf{x}^*) - f_t(\mathbf{x}_t) \leq \frac{1}{e} [f_t(\mathbf{x}^*) - f_t(0)] + \frac{1}{K} \sum_{k=1}^K \left[ \frac{1}{2\beta^{(k)}} \|\nabla f_t(\mathbf{x}_t^{(k)}) - \mathbf{d}_t^{(k)}\|^2 + \beta^{(k)} D^2/2 + \langle \mathbf{d}_t^{(k)}, \mathbf{x}^* - \mathbf{v}_t^{(k)} \rangle \right] + \frac{LD^2}{2K}.$$

Since  $f_t(0) \geq 0$ , we obtain

$$(1 - 1/e)f_t(\mathbf{x}^*) - f_t(\mathbf{x}_t) \leq \frac{1}{K} \sum_{k=1}^K \left[ \frac{1}{2\beta^{(k)}} \|\nabla f_t(\mathbf{x}_t^{(k)}) - \mathbf{d}_t^{(k)}\|^2 + \beta^{(k)} D^2/2 + \langle \mathbf{d}_t^{(k)}, \mathbf{x}^* - \mathbf{v}_t^{(k)} \rangle \right] + \frac{LD^2}{2K}. \quad (10)$$

If we sum Eq. (10) over  $t = 1, 2, 3, \dots, T$ , we obtain

$$(1 - 1/e) \sum_{t=1}^T f_t(\mathbf{x}^*) - \sum_{t=1}^T f_t(\mathbf{x}_t) \leq \frac{1}{K} \sum_{k=1}^K \left[ \frac{1}{2\beta^{(k)}} \sum_{t=1}^T \|\nabla f_t(\mathbf{x}_t^{(k)}) - \mathbf{d}_t^{(k)}\|^2 + \beta^{(k)} D^2 T/2 + \sum_{t=1}^T \langle \mathbf{d}_t^{(k)}, \mathbf{x}^* - \mathbf{v}_t^{(k)} \rangle \right] + \frac{LD^2 T}{2K}.$$

By the definition of the regret, we have

$$\sum_{t=1}^T \langle \mathbf{d}_t^{(k)}, \mathbf{x}^* - \mathbf{v}_t^{(k)} \rangle \leq \mathcal{R}_T^\varepsilon.$$

Therefore, we deduce

$$(1 - 1/e) \sum_{t=1}^T f_t(\mathbf{x}^*) - \sum_{t=1}^T f_t(\mathbf{x}_t) \leq \frac{1}{K} \sum_{k=1}^K \left[ \frac{1}{2\beta^{(k)}} \sum_{t=1}^T \|\nabla f_t(\mathbf{x}_t^{(k)}) - \mathbf{d}_t^{(k)}\|^2 + \beta^{(k)} D^2 T/2 \right] + \frac{LD^2 T}{2K} + \mathcal{R}_T^\varepsilon.$$

Taking the expectation in both sides, we obtain

$$(1 - 1/e) \sum_{t=1}^T \mathbb{E}[f_t(\mathbf{x}^*)] - \sum_{t=1}^T \mathbb{E}[f_t(\mathbf{x}_t)] \leq \frac{1}{K} \sum_{k=1}^K \left[ \frac{1}{2\beta^{(k)}} \sum_{t=1}^T \mathbb{E}[\|\nabla f_t(\mathbf{x}_t^{(k)}) - \mathbf{d}_t^{(k)}\|^2] + \beta^{(k)} D^2 T/2 \right] + \frac{LD^2 T}{2K} + \mathcal{R}_T^\varepsilon. \quad (11)$$

Notice that  $\|\nabla f_t(\mathbf{x}_t^{(k)}) - \nabla f_t(\mathbf{x}_t^{(k-1)})\| \leq L\|\mathbf{v}_t^{(k)}\|/T \leq LR/T \leq 2LR/(k+3)$ . By Theorem 3, if we set  $\rho_k = \frac{2}{(k+3)^{2/3}}$ , we have

$$\mathbb{E}[\|\nabla f_t(\mathbf{x}_t^{(k)}) - \mathbf{d}_t^{(k)}\|^2] \leq \frac{Q_t}{(k+4)^{2/3}} \leq \frac{Q}{(k+4)^{2/3}}, \quad (12)$$

where  $Q_t \triangleq \max\{\|\nabla f_t(0)\|^{2 \cdot 4^{2/3}}, 4\sigma^2 + 6L^2 R^2\}$  and  $Q \triangleq \max\{\max_{1 \leq t \leq T} \|\nabla f_t(\mathbf{x}_1)\|^{2 \cdot 4^{2/3}}, 4\sigma^2 + 6L^2 R^2\}$ .

Plugging Eq. (12) into Eq. (11) and setting  $\beta^{(k)} = (Q^{1/2})/(D(k+3)^{1/3})$ , we deduce

$$(1 - 1/e) \sum_{t=1}^T \mathbb{E}[f_t(\mathbf{x}^*)] - \sum_{t=1}^T \mathbb{E}[f_t(\mathbf{x}_t)] \leq \frac{TDQ^{1/2}}{K} \sum_{k=1}^K \frac{1}{(k+4)^{1/3}} + \frac{LD^2 T}{2K} + \mathcal{R}_T^\varepsilon$$

Since  $\sum_{k=1}^K \frac{1}{(k+4)^{1/3}} \leq \int_0^K \frac{dx}{(x+4)^{1/3}} = \frac{3}{2}[(K+4)^{2/3} - 9^{2/3}] \leq \frac{3}{2}K^{2/3}$ , we have

$$(1 - 1/e) \sum_{t=1}^T \mathbb{E}[f_t(\mathbf{x}^*)] - \sum_{t=1}^T \mathbb{E}[f_t(\mathbf{x}_t)] \leq \frac{3TDQ^{1/2}}{2K^{1/3}} + \frac{LD^2 T}{2K} + \mathcal{R}_T^\varepsilon.$$

## D. Proof of Theorem 2: Convex Case

Let  $f(\mathbf{x}) = \mathbb{E}_{f_t \sim \mathcal{D}}[f_t(\mathbf{x})]$  denote the expected function. Because  $f$  is  $L$ -smooth and convex, we have

$$\begin{aligned} f(\mathbf{x}_{t+1}) - f(\mathbf{x}^*) &= f(\mathbf{x}_t + \eta_t(\mathbf{v}_t - \mathbf{x}_t)) - f(\mathbf{x}^*) \\ &\leq f(\mathbf{x}_t) - f(\mathbf{x}^*) + \eta_t \langle \nabla f(\mathbf{x}_t), \mathbf{v}_t - \mathbf{x}_t \rangle + \eta_t^2 \frac{L}{2} \|\mathbf{v}_t - \mathbf{x}_t\|^2 \\ &\leq f(\mathbf{x}_t) - f(\mathbf{x}^*) + \eta_t \langle \nabla f(\mathbf{x}_t), \mathbf{v}_t - \mathbf{x}_t \rangle + \eta_t^2 \frac{LD^2}{2}. \end{aligned}$$

As before, the dual pairing may be decomposed as

$$\langle \nabla f(\mathbf{x}_t), \mathbf{v}_t - \mathbf{x}_t \rangle = \langle \nabla f(\mathbf{x}_t) - \mathbf{d}_t, \mathbf{v}_t - \mathbf{x}^* \rangle + \langle \nabla f(\mathbf{x}_t), \mathbf{x}^* - \mathbf{x}_t \rangle + \langle \mathbf{d}_t, \mathbf{v}_t - \mathbf{x}^* \rangle.$$

We can bound the first term using Young's Inequality to get

$$\begin{aligned} \langle \nabla f(\mathbf{x}_t) - \mathbf{d}_t, \mathbf{v}_t - \mathbf{x}^* \rangle &\leq \frac{1}{2\beta} \|f(\mathbf{x}_t) - \mathbf{d}_t\|^2 + 2\beta \|\mathbf{v}_t - \mathbf{x}^*\|^2 \\ &\leq \frac{1}{2\beta} \|f(\mathbf{x}_t) - \mathbf{d}_t\|^2 + 2\beta D^2. \end{aligned}$$

for any  $\beta > 0$ , which will be chosen later in the proof. We may also bound the second term in the decomposition of the dual pairing using convexity of  $f$ , i.e.  $\langle \nabla f(\mathbf{x}_t), \mathbf{x}^* - \mathbf{x}_t \rangle \leq f(\mathbf{x}^*) - f(\mathbf{x}_t)$ . Finally, the third term is nonpositive, by the choice of  $\mathbf{v}_t$ , namely  $\mathbf{v}_t = \arg \min_{\mathbf{v} \in \mathcal{K}} \langle \mathbf{d}_t, \mathbf{v} \rangle$ . Using these inequalities, we now have that

$$f(\mathbf{x}_{t+1}) - f(\mathbf{x}^*) \leq (1 - \eta_t) (f(\mathbf{x}_t) - f(\mathbf{x}^*)) + \eta_t \left( \frac{1}{2\beta} \|f(\mathbf{x}_t) - \mathbf{d}_t\|^2 + 2\beta D^2 \right) + \eta_t^2 \frac{LD^2}{2}.$$

Taking expectation over the randomness in the iterates (i.e. the stochastic gradient estimates), we have that

$$\mathbb{E}[f(\mathbf{x}_{t+1})] - f(\mathbf{x}^*) \leq (1 - \eta_t) (\mathbb{E}[f(\mathbf{x}_t)] - f(\mathbf{x}^*)) + \eta_t \left( \frac{1}{2\beta} \mathbb{E}[\|f(\mathbf{x}_t) - \mathbf{d}_t\|^2] + 2\beta D^2 \right) + \eta_t^2 \frac{LD^2}{2}. \quad (13)$$

Now we will apply the variance reduction technique. Note that

$$\|\nabla f(\mathbf{x}_{t+1}) - \nabla f(\mathbf{x}_t)\| \leq L \|\mathbf{x}_{t+1} - \mathbf{x}_t\| \leq L\eta_t \|\mathbf{x}_t - \mathbf{v}_t\| \leq L\eta_t D$$

where we have used that  $f$  is  $L$ -smooth, the convex update, and the diameter. Now, using Theorem 3 with  $G = LD$  and  $s = 3$ , we have that

$$\mathbb{E}[\|f(\mathbf{x}_t) - \mathbf{d}_t\|^2] \leq \frac{Q}{(t+4)^{2/3}},$$

where  $Q \triangleq \max\{4^{2/3} \|\nabla f(\mathbf{x}_1)\|^2, 4\sigma^2 + 3(LD)^2/2\}$ . Using this bound in Eq (13) and setting  $\beta = \frac{Q^{1/2}}{2D(t+4)^{1/3}}$  yields

$$\mathbb{E}[f(\mathbf{x}_{t+1})] - f(\mathbf{x}^*) \leq (1 - \eta_t) (\mathbb{E}[f(\mathbf{x}_t)] - f(\mathbf{x}^*)) + \eta_t \frac{2Q^{1/2}D}{(t+4)^{1/3}} + \eta_t^2 \frac{LD^2}{2}.$$

By induction, we have

$$\mathbb{E}[f(\mathbf{x}_{t+1})] - f(\mathbf{x}^*) \leq \prod_{k=1}^t (1 - \eta_k) M + \sum_{k=1}^t \eta_k \prod_{j=k+1}^t (1 - \eta_j) \left( \frac{2Q^{1/2}D}{(k+4)^{1/3}} + \eta_k \frac{LD^2}{2} \right),$$

where  $M = f(\mathbf{x}_1) - f(\mathbf{x}^*)$ . Recall that the step size is set to be  $\eta_t = \frac{1}{t+3}$ . As in Appendix B, we can obtain the bounds  $\prod_{k=1}^t (1 - \eta_k) = \prod_{k=1}^t (1 - \frac{1}{k+3}) \leq \exp(-\sum_{k=1}^t \frac{1}{k+3}) \leq \exp(-\int_1^{t+1} \frac{dx}{x+3}) = 4/(t+4)$  and similarly  $\prod_{j=k+1}^t (1 - \frac{1}{j+3}) \leq \frac{k+4}{t+4}$ . Using these bounds as well as the choice of step size  $\eta_t = \frac{1}{t+3}$  in the above yields

$$\begin{aligned} \mathbb{E}[f(\mathbf{x}_{t+1})] - f(\mathbf{x}^*) &\leq \frac{4M}{t+4} + \sum_{k=1}^t \left( \frac{1}{k+3} \cdot \frac{k+4}{t+4} \right) \left( \frac{2Q^{1/2}D}{(k+4)^{1/3}} + \frac{1}{k+3} \frac{LD^2}{2} \right) \\ &= \frac{4M}{t+4} + \frac{4}{3(t+4)} \sum_{k=1}^t \left( \frac{2Q^{1/2}D}{(k+4)^{1/3}} + \frac{1}{k+3} \frac{LD^2}{2} \right) \end{aligned}$$

where the second inequality used  $\left( \frac{1}{k+3} \cdot \frac{k+4}{t+4} \right) < \frac{4}{3(t+4)}$ . As before in Section B, using the inequalities  $\sum_{k=1}^t \frac{1}{k+3} \leq \log(t+1)$  and  $\sum_{k=1}^t \frac{1}{(k+3)^{1/3}} \leq \frac{3}{2}t^{2/3}$  in the above yields

$$\mathbb{E}[f(\mathbf{x}_{t+1})] - f(\mathbf{x}^*) \leq \frac{4M}{t+4} + 4Q^{1/2}D \frac{t^{2/3}}{t+4} + \frac{4}{3}LD^2 \frac{\log(t+1)}{t+4}. \quad (14)$$

To obtain a regret bound, we sum over rounds  $t = 1, \dots, T$  to obtain

$$\sum_{t=1}^T \mathbb{E}[f(\mathbf{x}_t)] - Tf(\mathbf{x}^*) \leq 4M \left( \sum_{t=1}^T \frac{1}{t+4} \right) + 4Q^{1/2}D \left( \sum_{t=1}^T \frac{t^{2/3}}{t+4} \right) + \frac{4}{3}LD^2 \left( \sum_{t=1}^T \frac{\log(t+1)}{t+4} \right)$$

Using the integral trick again, we obtain the upper bounds  $\sum_{t=1}^T \frac{1}{t+4} \leq \log(T+1)$ ,  $\sum_{t=1}^T \frac{t^{2/3}}{t+4} \leq \frac{3}{2}T^{2/3}$ , and  $\sum_{t=1}^T \frac{\log(t+3)}{t+4} \leq \log^2(T+3)$ . Substituting these bounds in the regret bound above yields

$$\sum_{t=1}^T \mathbb{E}[f(\mathbf{x}_t)] - Tf(\mathbf{x}^*) \leq 4M \log(T+1) + 6Q^{1/2}DT^{2/3} + \frac{4}{3}LD^2 \log^2(T+3) = O\left(T^{2/3}\right)$$

## E. Proof of Theorem 2: DR-Submodular Case

Since  $f$  is  $L$ -smooth, we obtain

$$\begin{aligned} f(\mathbf{x}_{t+1}) &\geq f(\mathbf{x}_t) + \langle \nabla f(\mathbf{x}_t), \frac{1}{T} \mathbf{v}_t \rangle - \frac{L}{2} \left\| \frac{1}{T} \mathbf{v}_t \right\|^2 \\ &\geq f(\mathbf{x}_t) + \frac{1}{T} \langle \nabla f(\mathbf{x}_t), \mathbf{v}_t \rangle - \frac{LD^2}{2T^2} \\ &= f(\mathbf{x}_t) + \frac{1}{T} \langle \mathbf{d}_t, \mathbf{v}_t \rangle + \frac{1}{T} \langle \nabla f(\mathbf{x}_t) - \mathbf{d}_t, \mathbf{v}_t \rangle - \frac{LD^2}{2T^2} \\ &\geq f(\mathbf{x}_t) + \frac{1}{T} \langle \mathbf{d}_t, \mathbf{x}^* \rangle + \frac{1}{T} \langle \nabla f(\mathbf{x}_t) - \mathbf{d}_t, \mathbf{v}_t \rangle - \frac{LD^2}{2T^2} \\ &= f(\mathbf{x}_t) + \frac{1}{T} \langle \nabla f(\mathbf{x}_t) - \mathbf{d}_t, \mathbf{v}_t - \mathbf{x}^* \rangle + \frac{1}{T} \langle f(\mathbf{x}_t), \mathbf{x}^* \rangle - \frac{LD^2}{2T^2}. \end{aligned}$$

In the last inequality, we used the fact that  $\mathbf{v}_t = \arg \max_{\mathbf{v} \in \mathcal{K}} \langle \mathbf{d}_t, \mathbf{v} \rangle$ . Similar to Eq. (6) in Appendix C, we have  $\langle f(\mathbf{x}_t), \mathbf{x}^* \rangle \geq f(\mathbf{x}^*) - f(\mathbf{x}_t)$ . Again, Young's inequality gives  $\langle \nabla f(\mathbf{x}_t) - \mathbf{d}_t, \mathbf{v}_t - \mathbf{x}^* \rangle \geq -\frac{1}{2}(\beta_t \|\mathbf{v}_t - \mathbf{x}^*\|^2 + \|\mathbf{v}_t - \mathbf{d}_t\|^2 / \beta_t)$ . Therefore, we deduce

$$\begin{aligned} f(\mathbf{x}_{t+1}) &\geq f(\mathbf{x}_t) - \frac{1}{2T}(\beta_t \|\mathbf{v}_t - \mathbf{x}^*\|^2 + \|\mathbf{v}_t - \mathbf{d}_t\|^2 / \beta_t) + \frac{1}{T}(f(\mathbf{x}^*) - f(\mathbf{x}_t)) - \frac{LD^2}{2T^2} \\ &\geq f(\mathbf{x}_t) - \frac{1}{2T}(\beta_t D^2 + \|\mathbf{v}_t - \mathbf{d}_t\|^2 / \beta_t) + \frac{1}{T}(f(\mathbf{x}^*) - f(\mathbf{x}_t)) - \frac{LD^2}{2T^2}. \end{aligned}$$



Re-arrangement of the terms yields

$$f(\mathbf{x}^*) - f(\mathbf{x}_{t+1}) \leq (1 - 1/T)(f(\mathbf{x}^*) - f(\mathbf{x}_t)) + \frac{1}{2T}(\beta_t D^2 + \|f(\mathbf{x}_t) - \mathbf{d}_t\|^2/\beta_t) + \frac{LD^2}{2T^2}.$$

Recalling that  $(1 - 1/T)^T \leq 1/e$  and  $f(\mathbf{x}_1) = f(0) \geq 0$ , we have

$$\begin{aligned} f(\mathbf{x}^*) - f(\mathbf{x}_{t+1}) &\leq (1 - 1/T)^t (f(\mathbf{x}^*) - f(\mathbf{x}_1)) + \frac{1}{2T} \sum_{i=1}^t (\beta_i D^2 + \|f(\mathbf{x}_i) - \mathbf{d}_i\|^2/\beta_i) + \frac{LD^2}{2T} \\ &\leq \frac{1}{e} f(\mathbf{x}^*) + \frac{1}{2T} \sum_{i=1}^t (\beta_i D^2 + \|f(\mathbf{x}_i) - \mathbf{d}_i\|^2/\beta_i) + \frac{LD^2}{2T}, \end{aligned}$$

which in turn yields

$$(1 - 1/e)f(\mathbf{x}^*) - f(\mathbf{x}_{t+1}) \leq \frac{1}{2T} \sum_{i=1}^t (\beta_i D^2 + \|f(\mathbf{x}_i) - \mathbf{d}_i\|^2/\beta_i) + \frac{LD^2}{2T}.$$

Taking expectation in both sides gives

$$(1 - 1/e)\mathbb{E}[f(\mathbf{x}^*)] - \mathbb{E}[f(\mathbf{x}_{t+1})] \leq \frac{1}{2T} \sum_{i=1}^t (\beta_i D^2 + \mathbb{E}[\|f(\mathbf{x}_i) - \mathbf{d}_i\|^2]/\beta_i) + \frac{LD^2}{2T}.$$

Notice that  $\|\nabla f(\mathbf{x}_t) - \nabla f(\mathbf{x}_{t-1})\| \leq L\|\mathbf{v}_t\|/T \leq LR/T \leq 2LR/(k+3)$ . By Theorem 3, if we set  $\rho_i = \frac{2}{(i+3)^{2/3}}$ , we have

$$\mathbb{E}[\|f(\mathbf{x}_i) - \mathbf{d}_i\|^2] \leq \frac{Q}{(i+4)^{2/3}}$$

for every  $i \leq T$  and  $Q = \max\{\|\nabla f(0)\|^2 4^{2/3}, 4\sigma^2 + 6L^2 R^2\}$ . If we set  $\beta_i = \frac{Q^{1/2}}{D(i+4)^{1/3}}$ , we have

$$(1 - 1/e)\mathbb{E}[f(\mathbf{x}^*)] - \mathbb{E}[f(\mathbf{x}_{t+1})] \leq \sum_{i=1}^t \frac{DQ^{1/2}}{(i+4)^{1/3}T} + \frac{LD^2}{2T} \leq \frac{3DQ^{1/2}t^{2/3}}{2T} + \frac{LD^2}{2T}$$

since  $\sum_{i=1}^t \frac{1}{(i+4)^{1/3}} \leq \int_0^t \frac{1}{(x+4)^{1/3}} dx = \frac{3}{2}[(x+4)^{2/3}]_0^t \leq \frac{3}{2}[x^{2/3}]_0^t = \frac{3}{2}t^{2/3}$ .

Therefore we have

$$\begin{aligned} &(1 - 1/e)T\mathbb{E}[f(\mathbf{x}^*)] - \sum_{t=1}^T \mathbb{E}[f(\mathbf{x}_t)] \\ &= (1 - 1/e)\mathbb{E}[f(\mathbf{x}^*)] - f(0) + \sum_{t=1}^{T-1} [(1 - 1/e)\mathbb{E}[f(\mathbf{x}^*)] - \mathbb{E}[f(\mathbf{x}_t)]] \\ &\leq (1 - 1/e)\mathbb{E}[f(\mathbf{x}^*)] - f(0) + \sum_{t=1}^{T-1} \left[ \frac{3DQ^{1/2}t^{2/3}}{2T} + \frac{LD^2}{2T} \right]. \end{aligned}$$

Since  $\sum_{t=1}^{T-1} t^{2/3} = 1 + \sum_{t=2}^{T-1} t^{2/3} \leq 1 + \int_1^T t^{2/3} dt = \frac{3}{5}T^{5/3} + \frac{2}{5}$ , we conclude

$$(1 - 1/e)T\mathbb{E}[f(\mathbf{x}^*)] - \sum_{t=1}^T \mathbb{E}[f(\mathbf{x}_t)] \leq (1 - 1/e)\mathbb{E}[f(\mathbf{x}^*)] - f(0) + \frac{3DQ^{1/2}}{10}(3T^{2/3} + 2T^{-1}) + \frac{LD^2}{2} = O(T^{2/3}).$$
